# Supplementary figures and images for: Structural Diversities and Phylogenetic Signals in Plastomes of the Early-Divergent Angiosperms: A Case Study in Saxifragales
Source: MDPI journal article supplement (doi:10.3390/plants11243544), 2022-12-15

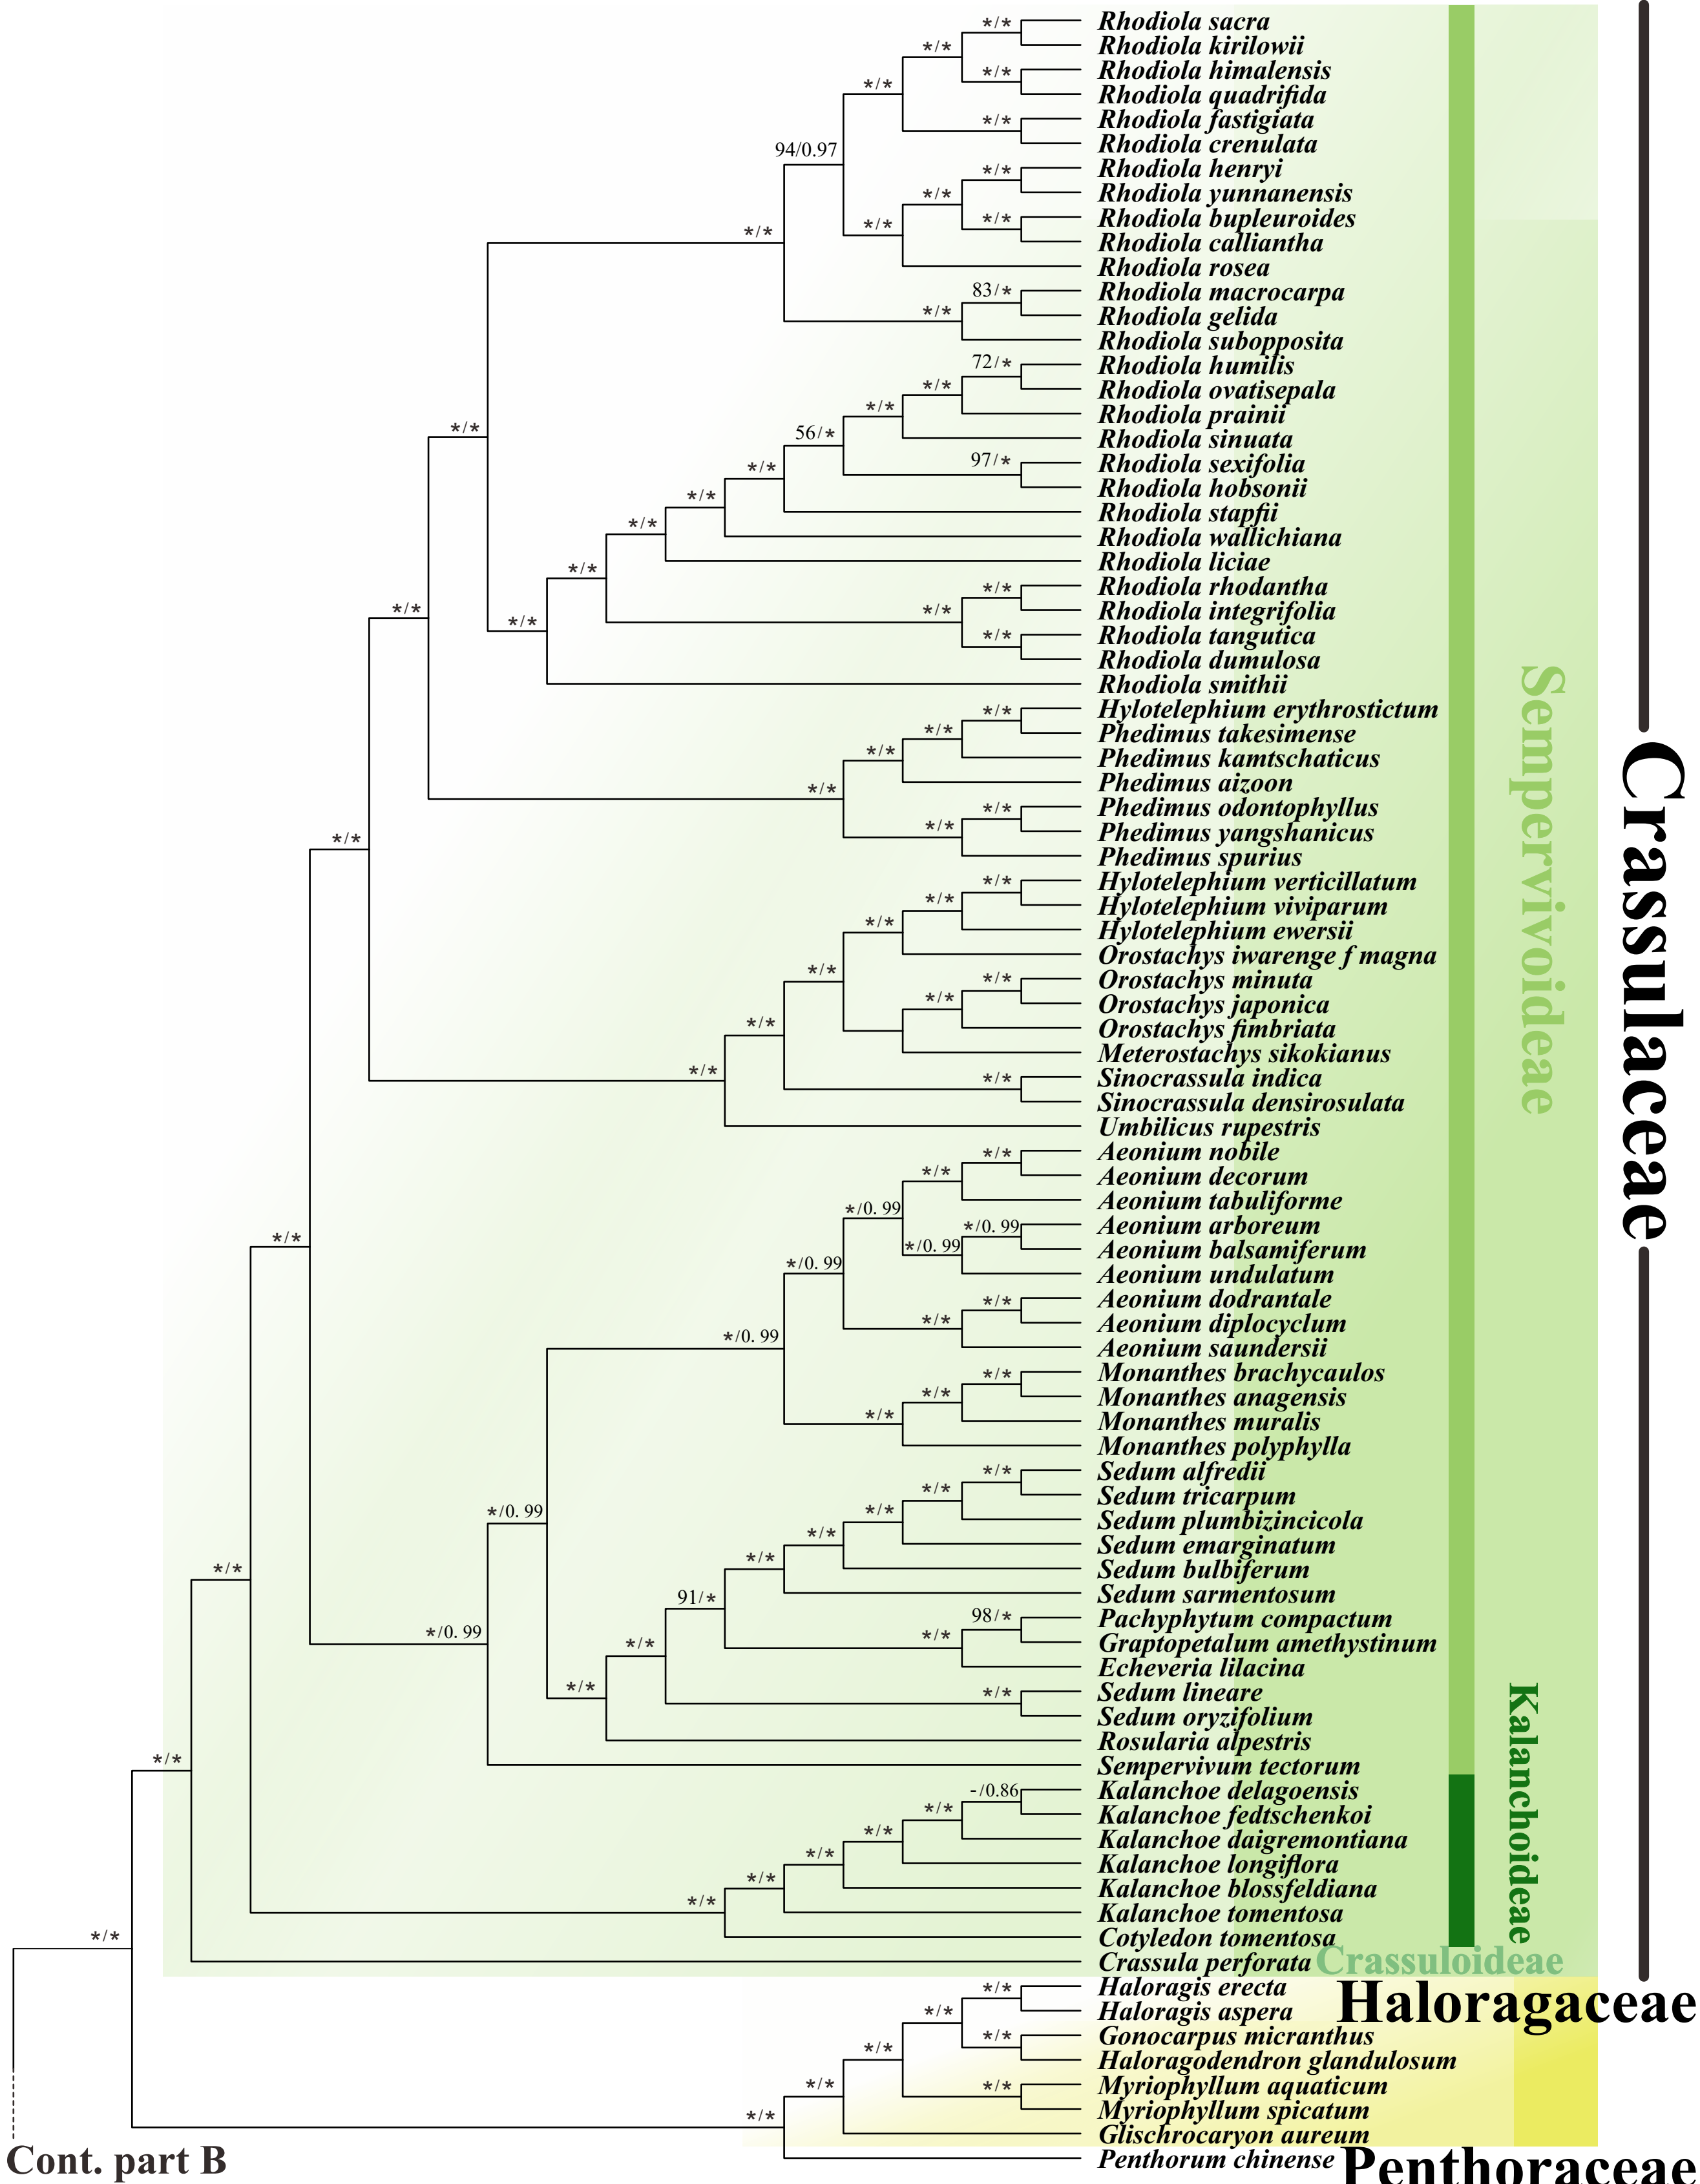

Cont. part A

Cont. part C

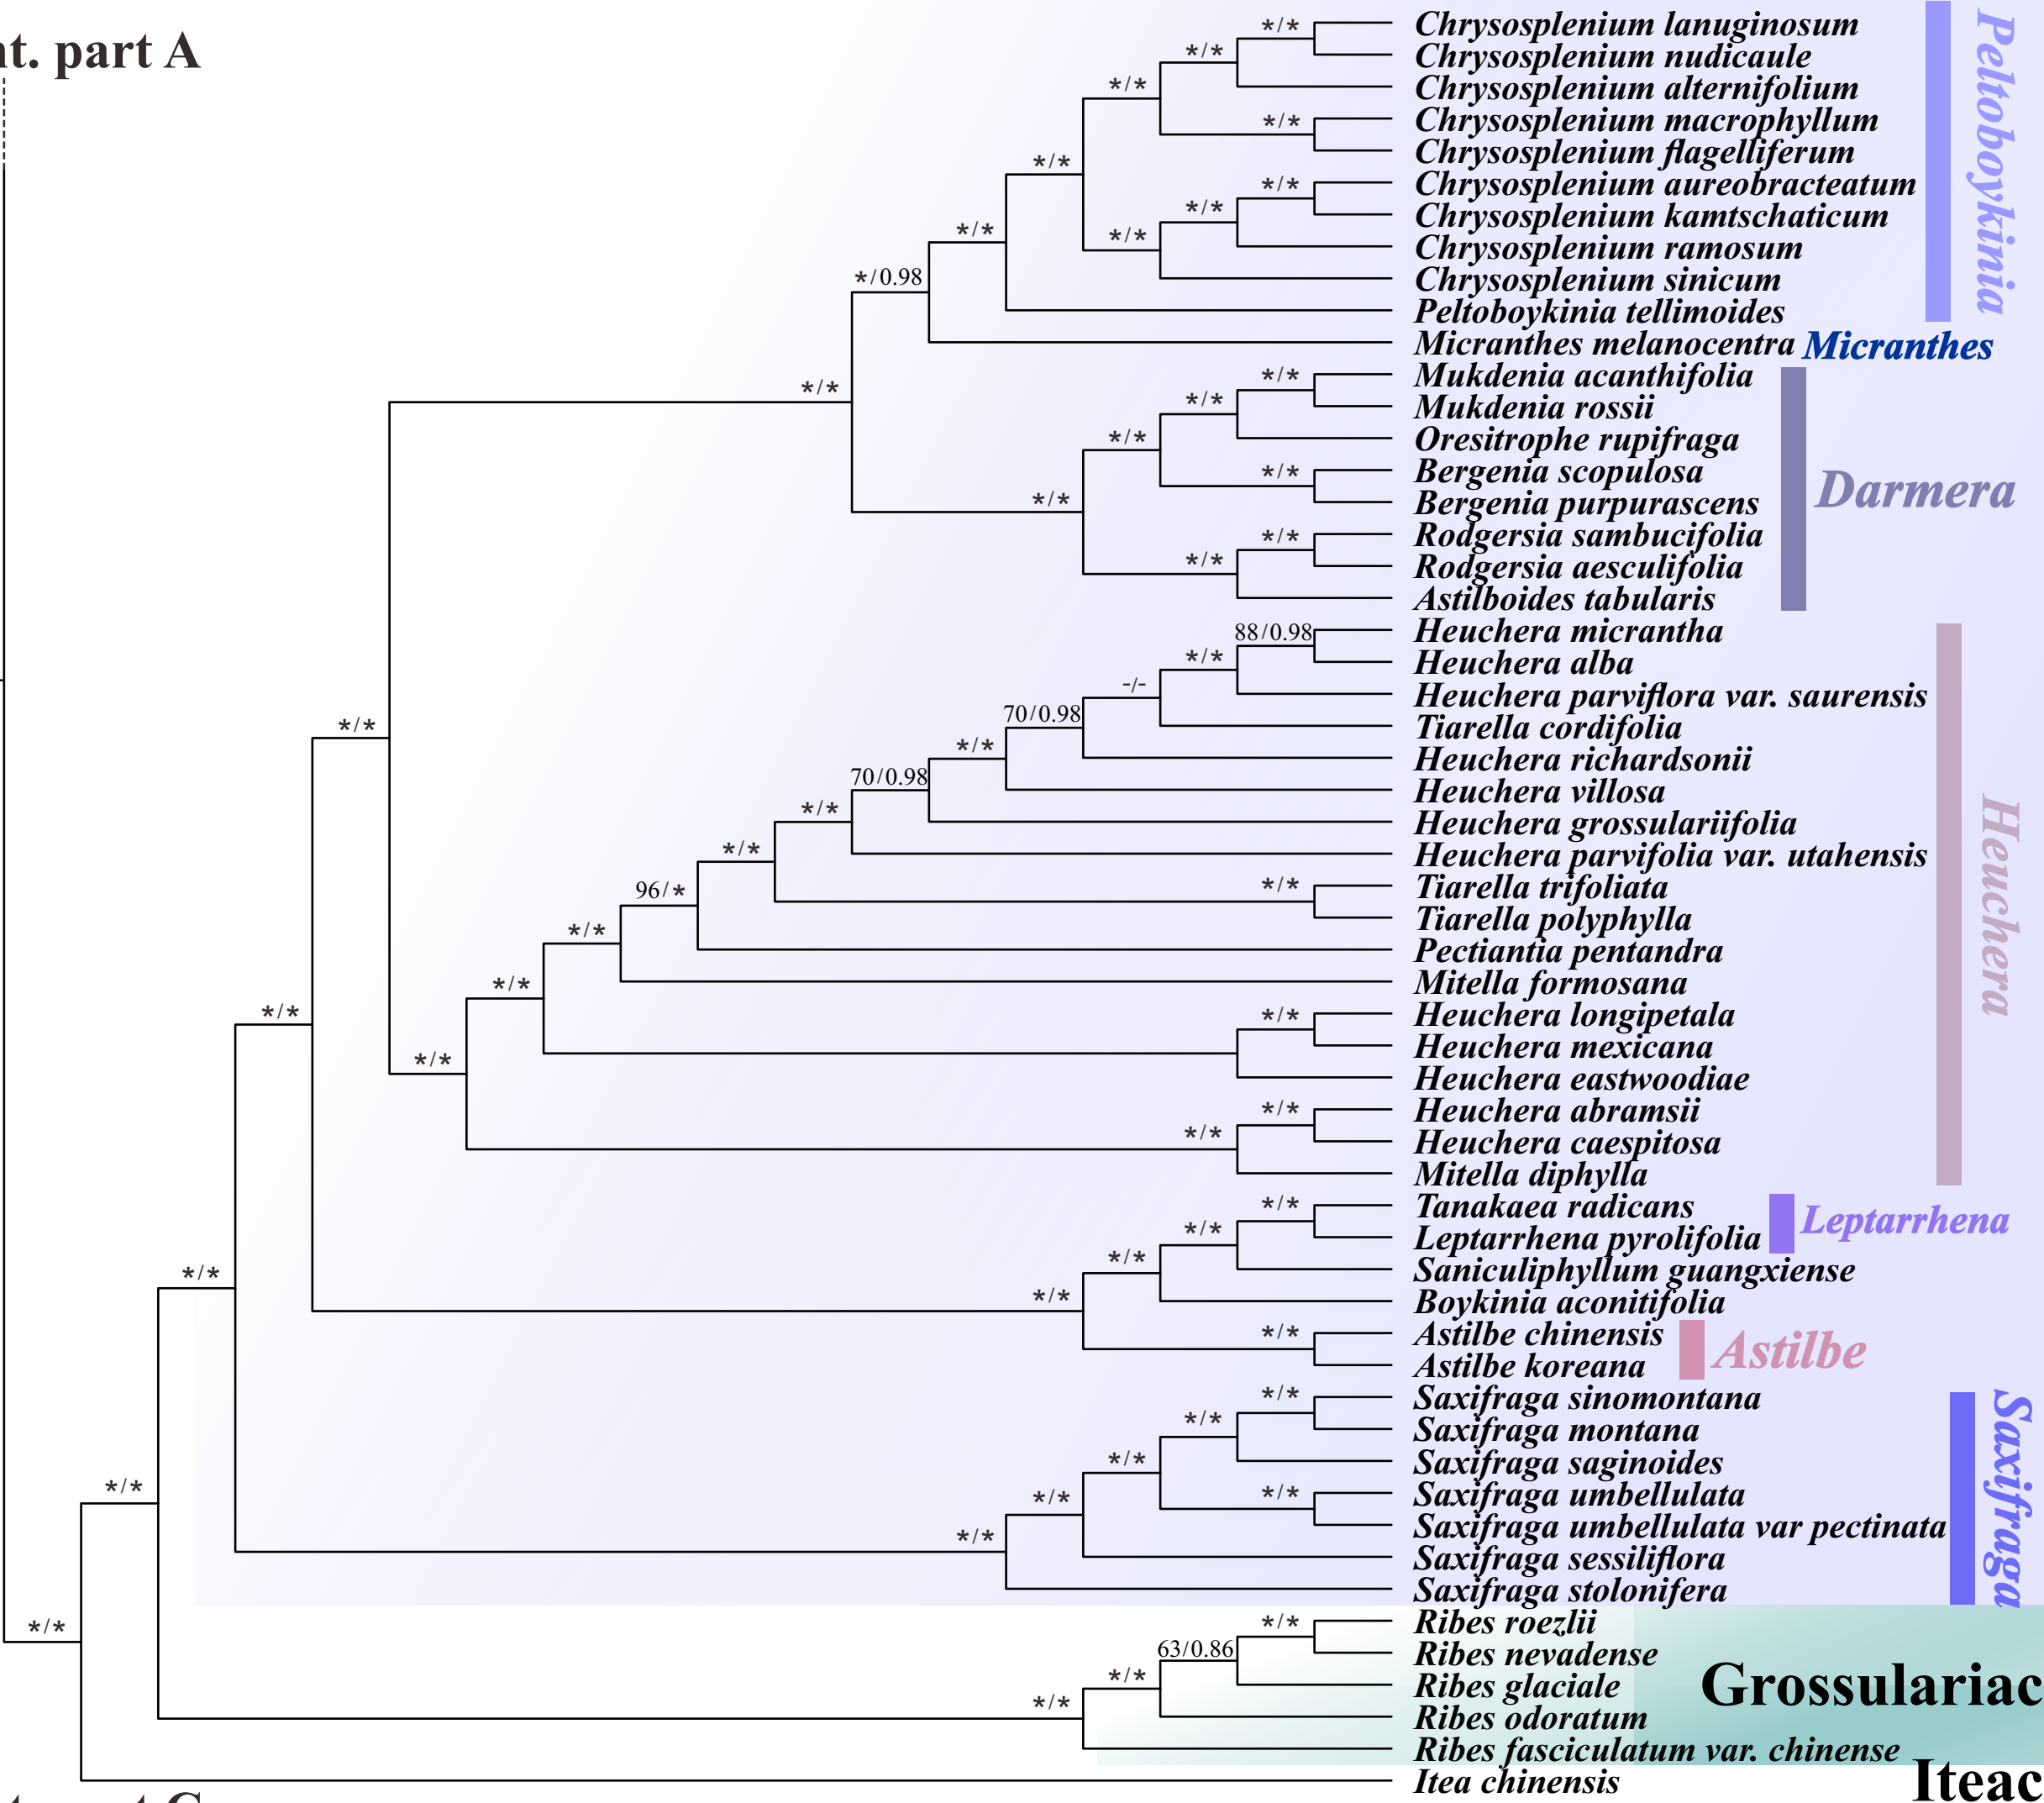

Saxifragaceae

Grossulariaceae

Iteaceae



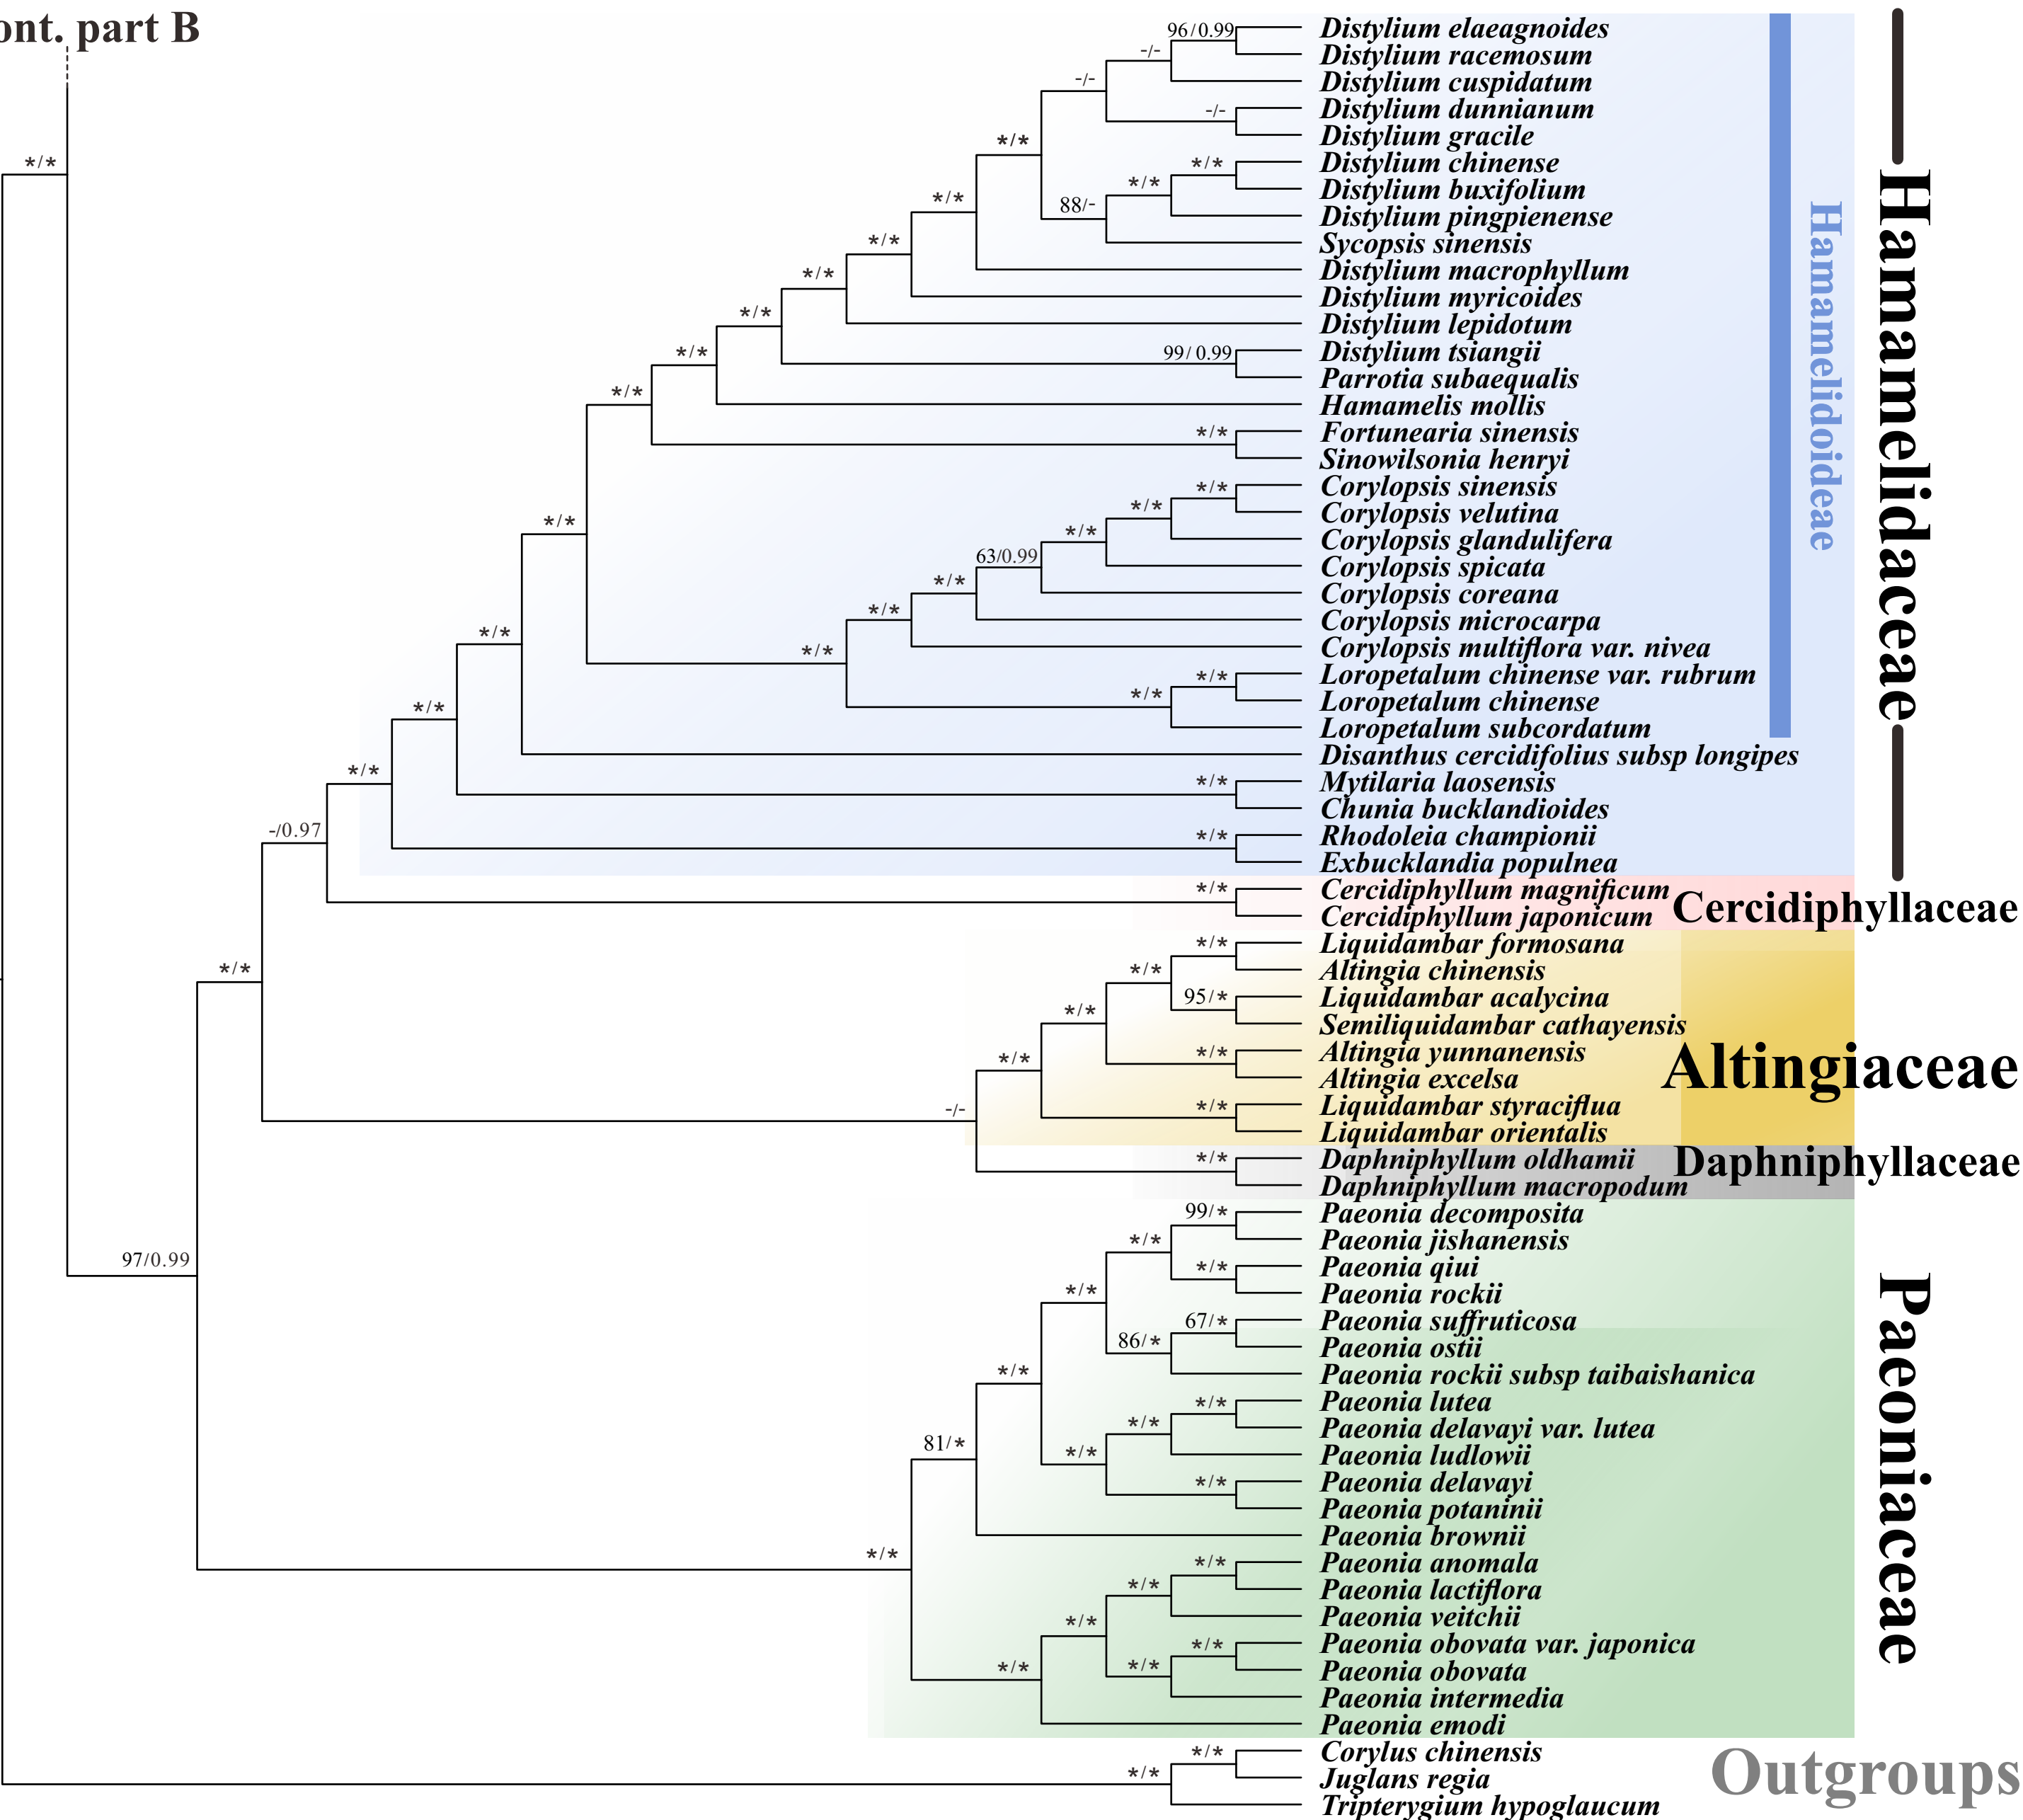

Supplement: s1 [file s1]
